# Supplementary material for: Combined methylation mapping of 5mC and 5hmC during early embryonic stages in bovine
Source: PubMed Central journal article supplement (PMC3689598; doi:10.1186/1471-2164-14-406), 2013-06-18
Supplement: 1471-2164-14-406-S1.pdf [file 1471-2164-14-406-S1.pdf]

**Supplementary Table 1.** PCR primer sequences and reaction conditions for methylation/hydroxymethylation validations.

| 5mC target number | Primer sequence 5' - 3'                              | Amplicon size (bp) | Annealing / Melting temp. (°C) | Genomic coordinates         | Description                   |
|-------------------|------------------------------------------------------|--------------------|--------------------------------|-----------------------------|-------------------------------|
| Me-RDA            |                                                      |                    |                                |                             |                               |
| 1                 | F: ACTCAAGAGCAGAGCAGGGTTT<br>R: TGTCCAGAAGCCAATGTTCC | 122                | 54/82                          | 3 loci                      | BTSAT4 including CHMP4B gene  |
| 2                 | F: GAACAGAGCGGGTTCTTGG<br>R: GTGCCGAAAACCTCGGTG      | 447                | 57/83                          | chr1:45,730,255-45,730,701  | BTSAT4 in ABI3BP gene         |
| 3                 | F: TTCCTGATCTTCGCCTACG<br>R: TTGCTCTCGAGCCATGGTA     | 89                 | 54/82                          | 25 loci                     | BTSAT4 including ADAMTS3 gene |
| 4                 | F: GGTGCCGAAAACCTCAGTG<br>R: GAGCGGGTTCTTTGCTTCA     | 442                | 57/84                          | 7 loci                      | BTSAT4 including SLC9A10 gene |
| 5                 | F: ACCGGGTTTCGGGAACCTTGT<br>R: AAGATGAAGCCCTTCCCGCT  | 107                | 57/85                          | chr27:6,860,721-6,860,833   | BTSAT4                        |
| 6                 | F: TTCTCGAGTTACGGCGGGAT<br>R: AGAGCGGGCTTCTTGCTTCA   | 248                | 57/83                          | chr27:6,862,265-6,862,527   | BTSAT4                        |
| 7                 | F: ATTGCTCCAGAGCCATGGGA<br>R: AGGTCCTTCCCACCTCCAGTTT | 177                | 57/83                          | chr13:7,751,833-7,752,009   | BTSAT4 in MACROD2 intron      |
| 8                 | F: TTGCTCACGAGCCATGGTA<br>R: AAGACGAGGGAACACAGGGT    | 105                | 57/86                          | chr13:7,750,436-7,750,540   | BTSAT4 in MACROD2 intron      |
| 9                 | F: TCGACCCTCCTGTCCAGAT<br>R: TCATCGCAAGATGAAGCCCT    | 206                | 57/85                          | 1047 loci                   | BTSAT4                        |
| 10                | F: AACCTCAGTGTTCTCTCG<br>R: AATTGGAGGTCGAAAGGGC      | 90                 | 54/86                          | 745 loci                    | BTSAT4                        |
| 11                | F: AAGACAATGTTCTCTCCGGG<br>R: AAGAGATACCCGTCGCGATT   | 132                | 54/86                          | chr23:48,068,660-48,068,791 | BTSAT4                        |

**Supplementary Table 1 (Part 2)**

| 5hmC target number | Primer sequence 5' - 3'                              | Amplicon size (bp) | Annealing / Melting temp. (°C) | Genomic coordinates           | Description                         |
|--------------------|------------------------------------------------------|--------------------|--------------------------------|-------------------------------|-------------------------------------|
| HMe-RDA            |                                                      |                    |                                |                               |                                     |
| 1                  | F: AGCCGCCGCTCGAGTACA<br>R: ACGTGGTTTTTCTCGGGTTGT    | 448                | 57/83                          | chr19:61,927,256-61,927,703   | BTSAT4 in ABCA5 gene                |
| 2                  | F: GCCCACAGAGCTCACTGAC<br>R: CAAGCTGGGGATTGCTCTCG    | 448                | 57/83                          | 160 loci                      | BTSAT4                              |
| 3                  | F: TGCTCCTTCCCGGGCG<br>R: AGGTCCCGGTGCCCTG           | 450                | 57/88                          | 6 loci                        | BTSAT6<br>including RLG1gene        |
| 4                  | F: GATCCACGCCATCAAAGGCT<br>R: GTGGGCCTTAGAAAGCATCACT | 446                | 55/72                          | chr11:107,310,060-107,310,507 | 80% BovB (LINE)<br>20% BTLTR1 (LTR) |
| 5                  | F: TGTGATCCACGCCATCAAAGG<br>R: TGGGCCTTAGAAAGCATCACT | 448                | 57/80                          | chr11:107,310,061-107,310,509 | 80% BovB (LINE)<br>20% BTLTR1 (LTR) |
| 6                  | F: GTGGGGTCACAAAGAGTCGG<br>R: GGGCAAGGCTGGCTAAATGT   | 442                | 57/80                          | chr14:42,051,387-42,051,831   | ZFHX4 gene                          |

**Supplementary Table 2.** List of the five most abundant repeated elements within each library.

| Repeated element name | Count  | Percentage of all repeats within library |
|-----------------------|--------|------------------------------------------|
| <hr/>                 |        |                                          |
| Me-RDA - Day 7        |        |                                          |
| BTSAT4                | 25,253 | 82.4%                                    |
| BTSAT6                | 1,486  | 4.9%                                     |
| ERV2-1-LTR_BT         | 1,473  | 4.8%                                     |
| BTLTR1                | 515    | 1.7%                                     |
| BTSAT3                | 412    | 1.3%                                     |
| <hr/>                 |        |                                          |
| HMe-RDA - Day 7       |        |                                          |
| BovB                  | 9,176  | 36.3%                                    |
| BTLTR1                | 4,413  | 17.5%                                    |
| BTSAT4                | 3,400  | 13.5%                                    |
| L1_BT                 | 1,288  | 5.1%                                     |
| ART2A                 | 975    | 3.9%                                     |
| <hr/>                 |        |                                          |
| HELP cocktail - Day 7 |        |                                          |
| ART2A                 | 13,022 | 36.6%                                    |
| BovB                  | 4582   | 12.9%                                    |
| BOV-A2                | 3029   | 8.5%                                     |
| Bov-tA2               | 1869   | 5.3%                                     |
| BTSAT3                | 1323   | 3.7%                                     |

| Repeated element name  | Count  | Percentage of all repeats within library |
|------------------------|--------|------------------------------------------|
| <hr/>                  |        |                                          |
| Me-RDA - Day 12        |        |                                          |
| BTSAT4                 | 18,957 | 87.1%                                    |
| BTSAT6                 | 1869   | 8.6%                                     |
| BTSAT2                 | 345    | 1.6%                                     |
| BTSAT3                 | 147    | 0.7%                                     |
| ERV2-1-LTR_BT          | 76     | 0.3%                                     |
| <hr/>                  |        |                                          |
| HMe-RDA - Day 12       |        |                                          |
| BTSAT4                 | 3,889  | 31.7%                                    |
| BTSAT6                 | 2,146  | 17.5%                                    |
| BovB                   | 1,875  | 15.3%                                    |
| BTLTR1                 | 1,068  | 8.7%                                     |
| BOV-A2                 | 352    | 2.9%                                     |
| <hr/>                  |        |                                          |
| HELP cocktail - Day 12 |        |                                          |
| ART2A                  | 8,319  | 24.2%                                    |
| Bov-tA2                | 3,079  | 8.9%                                     |
| BOV-A2                 | 2,632  | 7.6%                                     |
| BovB                   | 2,599  | 7.6%                                     |
| Bov-tA1                | 1,623  | 4.7%                                     |

**Supplementary Table 3.** Estimation of data quality.

| Method                                                         | Me-RDA<br>(5mC) | HELP<br>Cocktail<br>(5mC) | HMe-RDA<br>(5hmC) | GLIB<br>(5hmC) | Anti-CMS<br>(5hmC) | Anti-5hmC pAb<br>(5hmC) |
|----------------------------------------------------------------|-----------------|---------------------------|-------------------|----------------|--------------------|-------------------------|
| Reads with<br>intact internal<br>restriction site <sup>a</sup> | 6,9%            | 7,1%                      | 3,9%              | N/A            | N/A                | N/A                     |
| Estimate of<br>unmethylated<br>cytosine <sup>b,c</sup>         | 1.7%            | N/A                       | 1%                | <1%            | <0.1%              | <3%                     |

<sup>a</sup> Percentage of clean reads (for Blastocyst and Elongation embryos in Table 1) containing an intact restriction site for a methyl-insensitive endonuclease more than 10 nucleotides from the ends, indicative of incomplete genomic cleavage. <sup>b</sup> corresponding to <sup>a</sup> divided by 4, as for Me-RDA and HMe-RDA, the probability for a read to have at least a methylated or hydroxymethylated cytosine at one end is  $\frac{3}{4}$ , and to have unmethylated cytosines at both ends (false positive) is  $\frac{1}{4}$  (theoretical estimate for equiprobables situations). <sup>c</sup> Figures for GLIB, Anti-CMS and Anti-5hmC pAb methods are corresponding to the presence of unmethylated or methylated cytosines (false positives) as published by (Pastor, 2011) and (Huang, 2011).

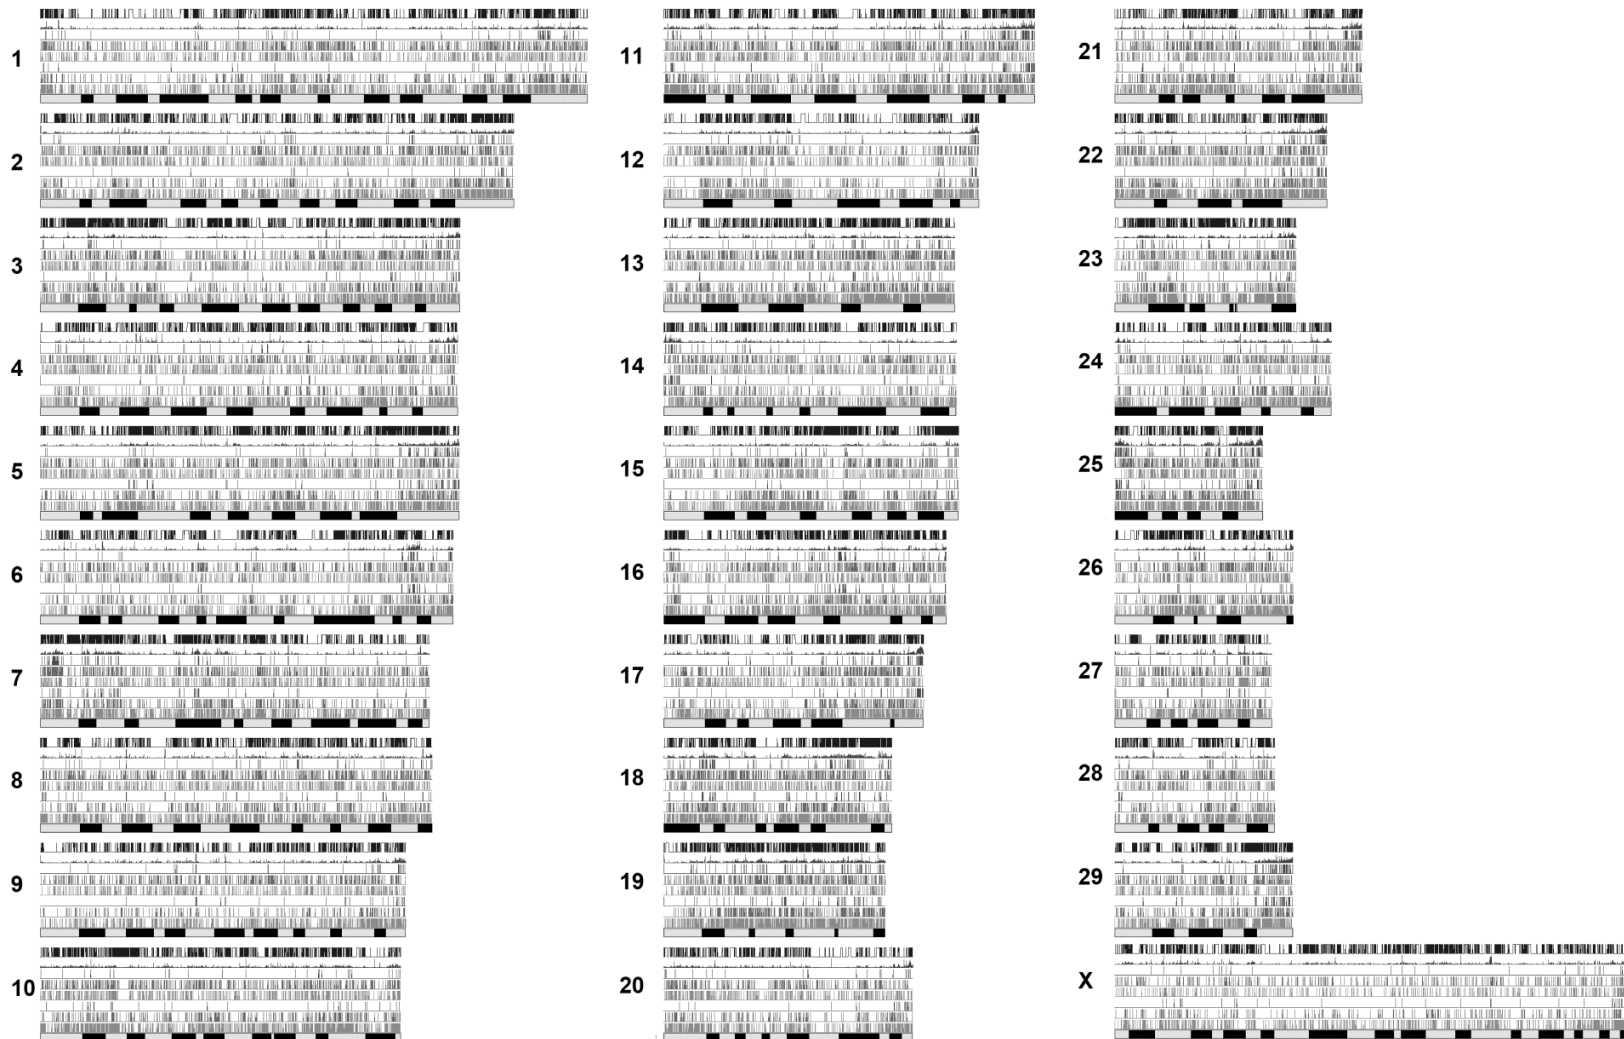

**Supplementary Figure 1.** Genomic coverage of putative methylated/hydroxymethylated restriction sites on all bovine chromosomes. Generated using the hgGenome tool of the UCSC Genome Browser. For each chromosome: chromatid representation with approximative cytochromes (black and grey boxes) adapted from (Liao, 2007). For each chromosome, line represents: (1) gene coverage, (2) CpG islands depth, (3 -5) putative methylated or hydroxymethylated sites for Me-RDA, HMe-RDA and HELP cocktail libraries for Day 7 embryos, (6-8) the same for Day 12 embryos.

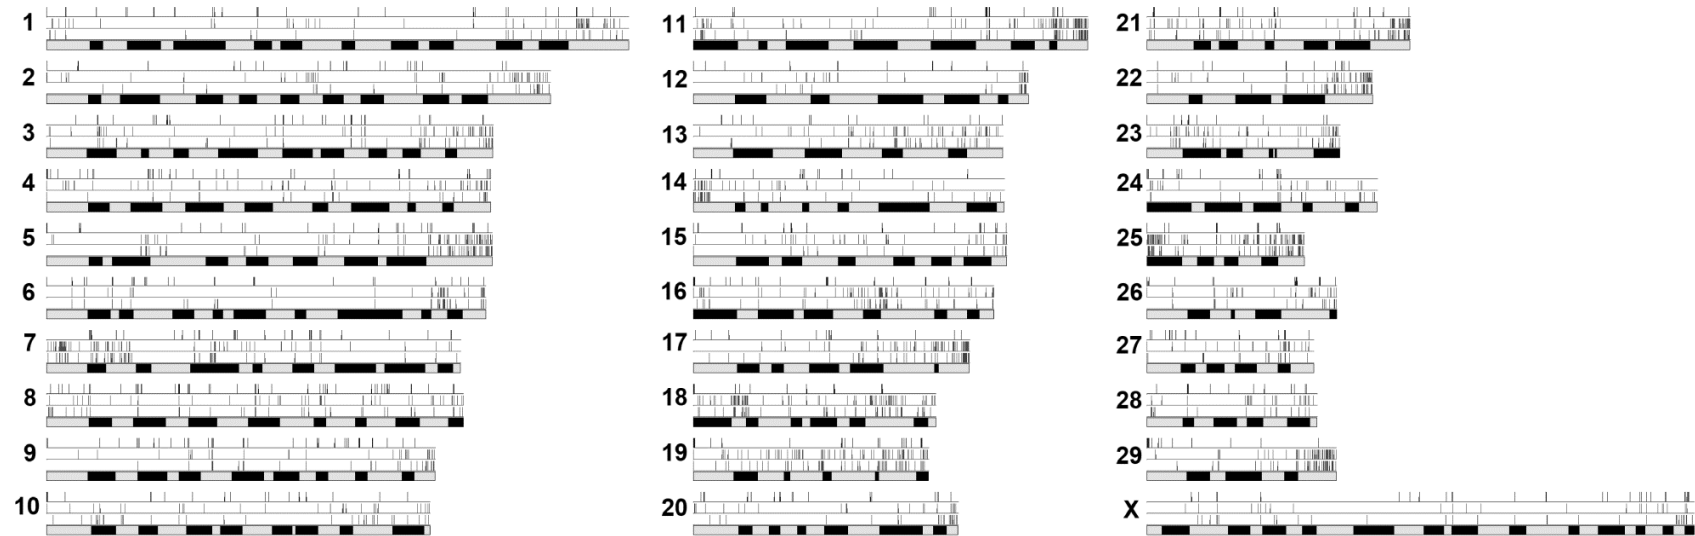

**Supplementary Figure 2.** Chromosomal distribution of BTSAT4 elements and of sites identified within the Me-RDA libraries. For each chromosome: approximative cytobands (black and grey boxes) adapted from {Liao, 2007}. Line 1: BTSAT4 elements. Line 2: sites identified in the Day 7 Me-RDA library. Line 3: sites identified in the Day 12 Me-RDA library.
